# Supplementary material for: A facile imine-linked covalent organic framework doped with a carbon dot composite for the detection and removal of Hg2+ in surface water
Source: Royal Society of Chemistry journal article supplement (doi:10.1039/d2ra01236g), 2022-01-01
Supplement: d2ra01236g1.pdf [file d2ra01236g1.pdf]

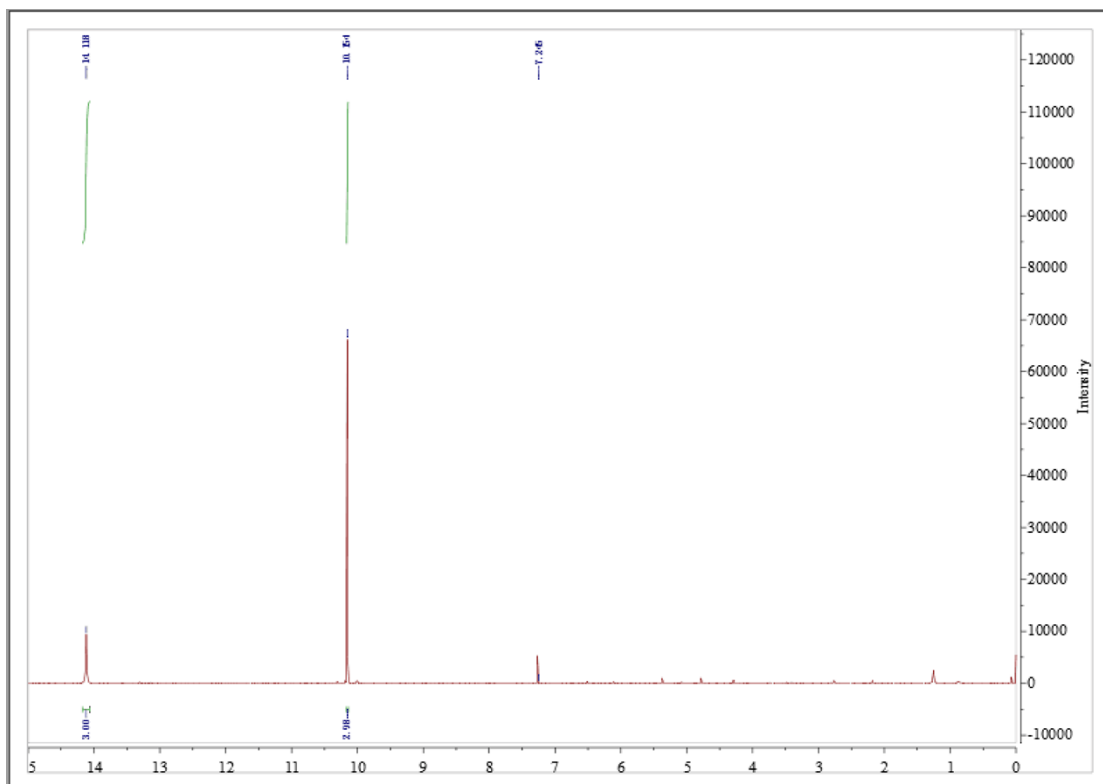

Figure S1 <sup>1</sup>H NMR spectra of Tp (600 MHz, CDCl<sub>3</sub>): -OH (14.118 ppm, S, 3H), -CHO (10.154 ppm, S, 3H)

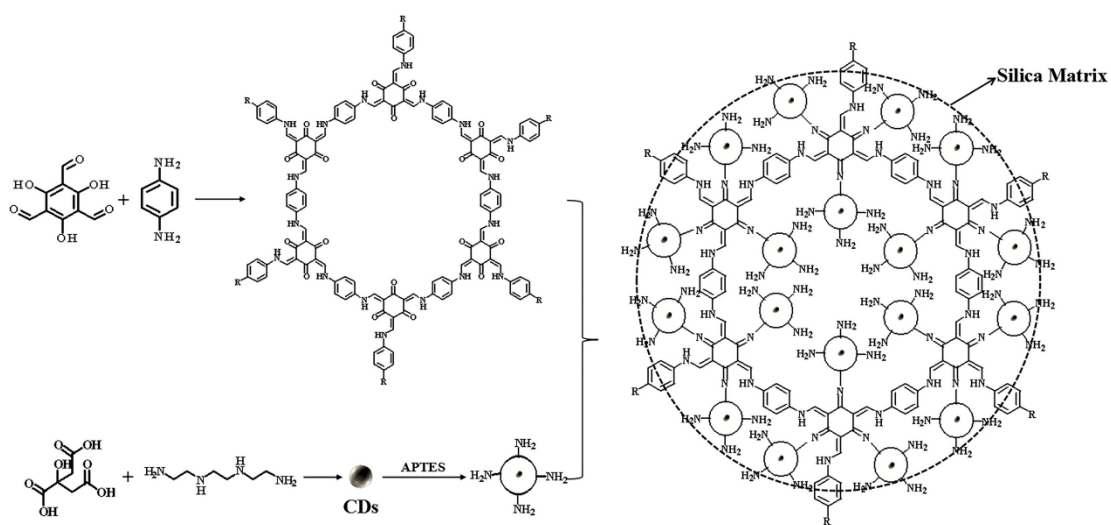

Figure S2 Preparation scheme of TpPa-1 COF@CDs

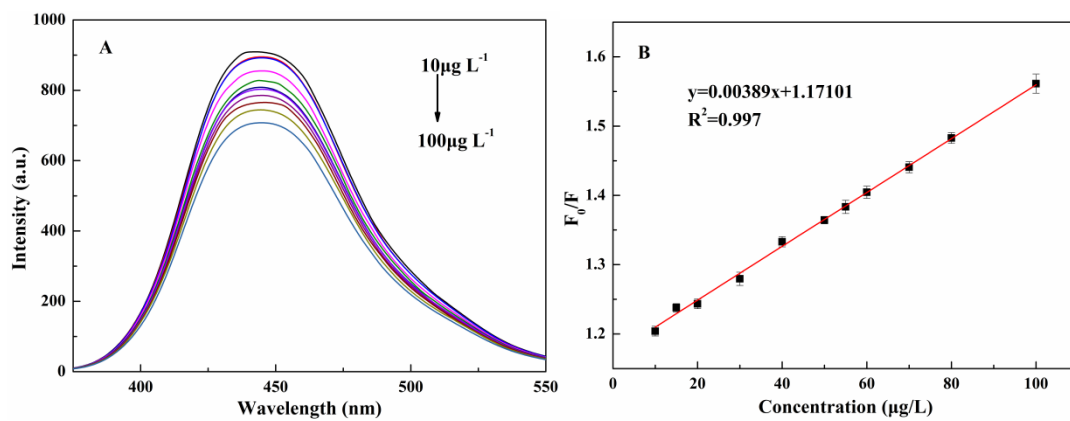

Figure S3 Fluorescence spectrum of TpPa-1 COF@CDs quenched by series concentration  $Hg^{2+}$  (A) and fluorescence titration curve for  $Hg^{2+}$  (B) in pure water

**Table S1 Relevant parameters of Nengjiang River sample**

| Test items | Temperature (°C)               | pH                            | Electric conductivity (ms m <sup>-1</sup> ) | Dissolved oxygen (mg L <sup>-1</sup> ) | Permanganate (mg L <sup>-1</sup> )       | Five-day biochemical oxygen demand (mg L <sup>-1</sup> ) | Ammonia nitrogen (mg L <sup>-1</sup> ) | Oil (mg L <sup>-1</sup> )     | Volatile phenol (mg L <sup>-1</sup> ) | COD (mg L <sup>-1</sup> )               | Total nitrogen (mg L <sup>-1</sup> )    | Total phosphorus (mg L <sup>-1</sup> ) | Mercury (mg L <sup>-1</sup> )  |
|------------|--------------------------------|-------------------------------|---------------------------------------------|----------------------------------------|------------------------------------------|----------------------------------------------------------|----------------------------------------|-------------------------------|---------------------------------------|-----------------------------------------|-----------------------------------------|----------------------------------------|--------------------------------|
| Test value | 12.0                           | 8.0                           | 14.8                                        | 8.38                                   | 3.8                                      | 1.3                                                      | 0.126                                  | —                             | —                                     | 17                                      | 0.42                                    | 0.02                                   | —                              |
| Test items | Selenium (mg L <sup>-1</sup> ) | Arsenic (mg L <sup>-1</sup> ) | Hexavalent chrome (mg L <sup>-1</sup> )     | Cyanide (mg L <sup>-1</sup> )          | Anionic surfactant (mg L <sup>-1</sup> ) | Sulfide (mg L <sup>-1</sup> )                            | Boron (mg L <sup>-1</sup> )            | Stibium (mg L <sup>-1</sup> ) | Formaldehyde (mg L <sup>-1</sup> )    | Hydrazine hydrate (mg L <sup>-1</sup> ) | Butylxanthic acid (mg L <sup>-1</sup> ) | Active chlorine (mg L <sup>-1</sup> )  | Titanate (mg L <sup>-1</sup> ) |
| Test value | —                              | 0.0007                        | —                                           | —                                      | —                                        | —                                                        | —                                      | 0.0004                        | —                                     | —                                       | —                                       | —                                      | —                              |

“ — ” represented that the test items was not detected in Nenjiang River sample.

**Table S2 The fluorescence lifetime of TpPa-1 COF@CDs solution before and after Hg<sup>2+</sup> addition**

| System components               | $\tau_1$<br>(ns) | $\tau_2$<br>(ns) | $T_{av}$<br>(ns) | $R^2$  |
|---------------------------------|------------------|------------------|------------------|--------|
| TpPa-1 COF@CDs                  | 4.0366           | 13.5251          | 11.99            | 0.8169 |
| TpPa-1 COF@CDs+Hg <sup>2+</sup> | 2.4534           | 9.5247           | 7.08             | 0.9867 |

**Table S3 Results of actual water sample recoveries (n=5)**

| Analytical samples | Detected value<br>( $\mu\text{g L}^{-1}$ ) | Added<br>( $\mu\text{g L}^{-1}$ ) | Found<br>( $\mu\text{g L}^{-1}$ ) | Recovery (%) | RSD (%) |
|--------------------|--------------------------------------------|-----------------------------------|-----------------------------------|--------------|---------|
|                    |                                            | 0                                 | — <sup>b</sup>                    | —            | —       |
| Nenjiang River     | — <sup>a</sup>                             | 20.00                             | 19.15                             | 95.76        | 5.66    |
|                    |                                            | 60.00                             | 59.04                             | 98.40        | 4.38    |
|                    |                                            | 90.00                             | 94.21                             | 104.68       | 7.62    |

—<sup>a</sup> and —<sup>b</sup> represented that the concentration of Hg<sup>2+</sup> in blank water sample was below detection limit using GB 3838-2002 method and the fluorescence method of this work, respectively.

**Table S4 Comparison of TpPa-1 COF@CDs with other fluorescent COFs**

| Names of Fluorescent COFs           | Reaction functional monomer                                                                                                      | Reaction time (h) | Adsorption capacity (mg g <sup>-1</sup> ) | Fluorescence (μg L <sup>-1</sup> ) | LOD | Recyclable times | References |
|-------------------------------------|----------------------------------------------------------------------------------------------------------------------------------|-------------------|-------------------------------------------|------------------------------------|-----|------------------|------------|
| AH-COF                              | 2,5-dihydroxy-3,6-diallylterephthalohydrazide (synthesized through three organic reaction procedures); 1,3,5-trisformylbenzene   | 72 h              | —                                         | 20                                 |     | 4                | 10         |
| TNPP                                | 4-(bis(4-bromophenyl) amino) benzaldehyde, tris (4-(4,4,5,5-tetramethyl-1,3,2-dioxaborolan-2yl) phenyl) amine, thiosemicarbazone | 84 h              | 47.8                                      | 22.8                               |     | 3                | 49         |
| COF based amine and sulfonyl groups | 2,4,6-trihydroxybenzene-1,3,5-tricarbaldehyde, 2,5-diaminobenzene sulfonic acid                                                  | 72 h              | 98.42                                     | 640                                |     | 5                | 19         |
| TFPPy-CHYD                          | 1,3,6,8-tetrabromopyrene, 4-formylphenylboronic acid, triphenylphosphine                                                         | 72 h              | 758                                       | 3.41                               |     | 6                | 52         |
| NOP-28                              | cyanuric chloride, anhydrous AlCl <sub>3</sub> , diphenylsulfane                                                                 | 24 h              | 658                                       | 12                                 |     | —                | 54         |
| TPE-S-COF                           | 4,4'-dithiodianiline, 4',4'',4''',4''''-(ethene-1,1,2,2-tetrayl) tetrakis-((1,1'-biphenyl)-4-carbaldehyde))                      | 120 h             | 42.4                                      | 38.7                               |     | 3                | 16         |
| TpPa-1 COF@CDs                      | p-phenylenediamine, 1,3,5-triformylphloroglucinol, tartaric acid, ethylenediamine                                                | 20 h              | 235                                       | 0.75                               |     | 5                | This work  |

“—” represented that it is not mentioned in the previous report.

**Table S5 The previous methods of detection of Hg<sup>2+</sup> using carbon dots as fluorescent probe**

| Carbon source            | Detection limit<br>( $\mu\text{mol/L}$ ) | Concentration range<br>( $\mu\text{mol/L}$ ) | References |
|--------------------------|------------------------------------------|----------------------------------------------|------------|
| catechol                 | 0.015                                    | 0.015-10                                     | 29         |
| folic acid               | 0.1                                      | 0-16                                         | 30         |
| ampicillin sodium        | 0.033                                    | 0-50                                         | 32         |
| ammonium citrate         | 0.41                                     | 0-20                                         | 33         |
| 2,4,6-triaminopyrimidine | 0.011                                    | 0-10                                         | 34         |
